# Supplementary material for: Evolution of Host Specificity by Malaria Parasites through Altered Mechanisms Controlling Genome Maintenance
Source: PubMed Central journal article supplement (PMC7078485; doi:10.1128/mbio.03272-19), 2020-03-17
Supplement: mBio.03272-19-sf001.pdf [file mBio.03272-19-sf001.pdf]

## Supplemental Figure 1:

### Rev1 Alignment

Pf3D7\_0910500 mdieyggardfekyvnckeekiplsynkkylaeieeshkkck-ndsllfmcncFYIDDFVSFFSICNTldnsntqtkciY  
LF\_Rev1 -----  
PHC\_Rev1 mdmeyggarsmglyfrnkekrtprrsykkkyveieesaknysltncriftnccnFYIDDLISLSTIGNNSstntplkewaY  
PHT\_Rev1 -----  
HPC\_Rev1 -----FYIDDFVSLFPLYSS-----Y

Pf3D7\_0910500 RNekdsvedskelnnymnnsinkttlgkfnmenkmeynytsinehnnnyyinkihndsvfKYQMDKTPMKNIDNNS  
LF\_Rev1 -----  
PHC\_Rev1 PQ-----vKRERLSESENEKEKE---  
PHT\_Rev1 -----KRERLSESENEKEKEKEK  
HPC\_Rev1 EHv-----nntieqtp---fpyecktqikyp--neyneynkhlntstvtd-----MYRTPTKSNFYSFN

Pf3D7\_0910500 NNNNNNDnnnNNGNTYLYDNYLEDQFNQT-----IKNRYSTPNDQISTCTKSFNTCIKTYEEQASSCK  
LF\_Rev1 -----ESPLK  
PHC\_Rev1 -----YCATEVFHNTCFEDPVFVSdgsseqngvlnttpIKSECRYDEANTMYTYPVSVKTYINTNEESAHTT-P  
PHT\_Rev1 ENENENENeeaYCATEVFQSNYFDDPLF-----tpIRNECRYDETNTIYTNPSASKTCYNTNGELTYTT-S  
HPC\_Rev1 STLYNNDG-----MYHEYKNKSNFMStqrsyksiidd---RNTNYIKDINGINNSYNKFDNFMNVHKNI--NSFE

Pf3D7\_0910500 KNVYNSYINKKENLEILIVQNGGVIHNTLTskVTHIISNNMALGSKKYMDYKKAIKKSKVFIVIDQYIFDCVNMQCRLPE  
LF\_Rev1 SITHNSYINKKERLEILIGQYGGTIHNVLTskVTHIVSNMMSIGSKKYSDLKKIKKWSVCIVTDSYIFDSVKEKTRLSE  
PHC\_Rev1 TPVHNSYINKKENLEILIVQNGGRIHNI LTGEVTHIISNNMALGNKKYADFkrkvkrskvfiiedtyvfdcvkansrlce  
PHT\_Rev1 TPVHNSYINKKENLEILIVQNGGRIHNI LTGEVTHIISNNMALGNKKYADFkrkvkrskvfiiedtyvfdcvkansrlce  
HPC\_Rev1 KPvQATYINKKELEILIVQNGGILHNA LTNKVKNIISNNMALGSKKYMDYKksLkknkifivvdkyifdcvYRGKRLPE

Pf3D7\_0910500 QSYLPSMLRYNCHQITEYFSLRKkdkeQNKKMQNKKIQDKINNDQNFLKEHKEGEQnvtildtskcdKQlNDYyVEKKL  
LF\_Rev1 QSYLPLSLRFNSHQITEYFKLHK-----RKNNRTHDFSEKQKSLPTNIRKETERIEEfkevsrss--LAHSTGLLQSFT  
PHC\_Rev1 QLylPKTLRYNSRQITEYFPLNK----QRKRSQTNSKSKD-----  
PHT\_Rev1 QLylPKTLRYNSRQITEYFPLNK----QRKRSQTNSKSKDKNSENKETIEKKSVD-----lnkdQTLNLEEDEV  
HPC\_Rev1 QSYL-----INNn\*\*-----

P Pf3D7\_0910500 STCHNKTSVNNNLNKTDMYGTK--edNNLLIHKDIgnnenlnyiNEQKVREENNNEEKENITNNDN--INKHLEILNMN  
LF\_Rev1 RVNQSGFSNFNNIVVDTRKGNVi---HVGVPERTItyqdknplsNDNSQIHNNNNNNNEECIENDKefIENKkkQLyLN

PHC\_Rev1 -----EKEK-----EKEKETGMEQTEEKELNA-EENK--SSEKMKALLME  
PHT\_Rev1 KYCPSEGNNGNLKNQKEANEerneeQEEMEKEQ-----EQEKKK-KEQTEENDPSTTEEKE--SNEKMKTLLEME  
HPC\_Rev1 -----VNILNMN

Pf3D7\_0910500 MDYEHVKKFIICNSNEYFKRLQEYYLEKELKENIYSNvSSNLYLNKNTFEDFCRKYRILNLYLSDEEIKWLKCKSELNINI  
LF\_Rev1 MSYEKLITLIKTPGDEYFKMLFQKCRFMELENPVFPI-KSEVYLNGTNFEFLKKNYININFDSEEIRWIREESRLNLKI  
PHC\_Rev1 MDYDELKKYIITDYSSYFSRLYKYYCDKERKETIFCT-TSDLYLNKNNFEFARKYRILNLYLTEEEIRWIKNKSKLNLKI  
PHT\_Rev1 MSYDELKKYIITNYSNYFSRLYKYYCDKERKETIFCT-TSDLYLNKNNFEFARKHRILNLYLTEEEISWIKNKSKLNLKI  
HPC\_Rev1 MSYINVKKYIILSNSSEYFKKLYKYIIDKELKQNSFPNiQSDLFINKDTCPEFLQKYKIRNYFNMNEIKWLKNSKINIHI

Pf3D7\_0910500 KNLWENDIIHFFFDLVLRKKEHFKNNTVGNnignhgnnnnignnHNIGNNNNIGNnnntqsyTDINKsSSYICE  
LF\_Rev1 KNIWENDIMHFLFKMILRKYPRFSEETRk-----DKEKKKPSVTEEKtthny-----DSMSE  
PHC\_Rev1 RNIWENNfVHFFNMVLKKK-----FDVSKQNCsMTND-----TKKDeDEEMSD  
PHT\_Rev1 RNIWENDFIHFFNMVLKKK-----FDVSKQNCsMENND-----TKEDG-DEEMSD  
HPC\_Rev1 KNVWENDMVHFFFDTVLKSVMQNYDEKLks-----DRGKLSEEIKETS-----SN

Pf3D7\_0910500 NLIESISAYLYNSRLYILGNWNYISKELFNFDIKEYEKgsKKFVYLYIDFDNYFLNASIR-----nkiemYEKKKSM  
LF\_Rev1 GLIQHISEYLYNSRLYILGNWNYIAKLFPPFRDLREKDK--RKHVYLYIDFDYFLNssVNKDSYH-----YKECNM  
PHC\_Rev1 KLIDSISGYFNNSRLYILGNWSYITKALFDNDIQLTAE--KKCVYLYIDYDYFLNASINKNNND-----NKNI  
PHT\_Rev1 KLIDSISGYFNNSRLYILGNWSYITKALFDNDIQLTTE--KKCAYLYIDFDYFLNASINKNNNDkvnspisYGDKNI  
HPC\_Rev1 ELIKTIKDYLYNSRLYVILGNWSYINKIFNFHDIKTSKs-pNKCVYLYIDFDYFLNASIKRGNNL-----FRSNDSF

Pf3D7\_0910500 NNEIFCVCHSLKKEDSYGIISSTNYWGKKNKILKGMVKGEATK-MNKNINfVKYDFSNILKCSYLFLLLVLINYSKNVRVL  
LF\_Rev1 NNSVLCVCHSVKKEESYANISSVNYWAQKNKIYKGLMKKEATN-LHKDIHFVKYNfSNILRNSFLFLLLVLLNFsYVVKVS  
PHC\_Rev1 NNSIFCVCHSTKKEDSFGMISSINYWAAKNKIYKGLMKMDATRILHKTIFIRYDFSNILKCSFLMLLLVLMNYSSTNVKVS  
PHT\_Rev1 NNSIFCVCHSTKKEDSFGMISSINYWAAKNKIYKGLMKMDATRILHKTIFIRYDFSNILKCSFLMLLLVLMNYSKNIKVS  
HPC\_Rev1 NNRIVCVCHSLKKENSYGIISATNYWGKKNKI KGMVKSDVTKVHKNNEfVKYDFSNILKCSYLFLLLILINYSKYVRVI

Pf3D7\_0910500 SVDESILQLFYEKKEEDIFIISKKISDDIYRLTNLSVSIIGISHDLSTSRKALKFCKKRfMFFDFYHHFNIFIK-KYISLKN  
LF\_Rev1 SIDECVLQLFYEKKEEVIQIAKRISNHISYLTDLNVTIGIAKDLASARVAAKFCKKRYMFFDFYHHFCIFLR-KYIDQKN  
PHC\_Rev1 SVDESVVQLFYEKKEEIFTIAKKISNDIYNLTRLNVTIGISDNLEVARHAAKfCKKRFLFFDFYHHFCIFLR-KYIDWKR  
PHT\_Rev1 SVDESVVQLFYTKKEEIFTIAKQISNDIYNLTRLNVTIGISDKLEVARHAVKfCKKRFLFFDFYHHFCIFLR-KYIDWKK  
HPC\_Rev1 SIDECILQLFYEKETDINIANKICDDIYSLTNLVVSIGISDDLILAKHALKYCKKRYIFFDFYHHFKIFIRrKCVRGSG

Pf3D7\_0910500 KES-----NITPEASNDNINKSNTISDDKIINGKCLKHMIEQKNVNGTNTDDYRTNWMSDDKLDLFKEYL  
LF\_Rev1 ESKM-----NSMKEDFKKDLTT-----TMTTTTTTTTTTTTTITNSSEPPDPCILFNAYL  
PHC\_Rev1 EGEFvdfniyylnhykNRRNKINNNNNNNHNNKNDNRNDKNAFFMNGENK-----

PHT\_Rev1 ER-----mqqkrKKRNEKQKQKNEVTDETKNETKNETKDITKD-ETKNETKNETKDE--TTNETKNETTDLFDVYV  
HPC\_Rev1 ESTS-----SNSCNGNSCNSNIYELNSSEIN-VEQLFNEYM

Pf3D7\_0910500 SFEKKRKSELKYNENNKEKYNMNI DNIYFMNLIK-GKREkeVEEYIYNKFLEMNKEN--IEQMNTYFEEVI-HPVSTYFF  
LF\_Rev1 S---EMNEETKWNTCTNEDRDRD-----FLNHVK-RIDP-EVQTLFASFMTKHKNE--LESILNTFFEKVV-HPISKHFF  
PHC\_Rev1 -----  
PHT\_Rev1 KFEEKKRKR-DFGEDEKEETQA EYIDVAFLKHVK-QKDE-EVENVFEKFMNLHQNN--LETILNTFFDKIV-HPVSKYFF  
HPC\_Rev1 LFEEKRGHSSINPNGT PNNMPNNTPNKYFLNGIE dKKEEkeIEIILFDKFIKIHKEKkkMENILNTYYEDVtpQQVSKYFY

Pf3D7\_0910500 FYKPNE-YYFNILKNMNYLNG-YFISFNMYLPHIENDSNNNNNNNNHHHSNNNLHSNNNFHSNNNWLN--nkMDRNINK  
LF\_Rev1 FFKKDDaFYFKILQQFNMYMHG-KFISFNIRMFDDIEIMNEKKNKTSKVP AQHSN-----  
PHC\_Rev1 -----MEVGTNP  
PHT\_Rev1 FYLKNN-FYFDILKKYNYMKG-KFVDFNIYYLNNE SYINNGSNNGSNNNNNNNRKNKKNKNTIFLNgenkMESNQNT  
HPC\_Rev1 FYKKNY-YHLNILNKLNYMDGgTFINLNIYY-----NNQDNQDDNIYANTYVDKDKTKVTM-----

Pf3D7\_0910500 KELENNDEKKS INISVNYGVRFNKINDFYFLIYFMTKQLYLRLKIKNLKAKLLHVNF FIKAEENVNPMKYLGGRVIRI  
LF\_Rev1 -----DLSKS INIRVNYGVRFTKINDFYFLIYFMCQQLFLRLKIKKLKARSLHISFFIKLEEAPVNP IKFLGRGKVSRA  
PHC\_Rev1 NISENLNETKSMS IRANYGIRFNKINDFYFLIYFMTKQLYLRLKIKNSKAKNLT MNFFLREENENVDPAKYLGGRKVINL  
PHT\_Rev1 GINENLNETKSMS IRANYGIRFNKINDFYFLIYFMTKQLYLRLKIKNSKAKNLSMNFFLREENENVDPAKYLGGRKVINL  
HPC\_Rev1 RTQNEGNEKKS INISVNYGVRFSNINDFYFLIYFMTKQLYIRLKI KKWTKCLSVFFFIREKNENINPTKFLGRGKVYRV

Pf3D7\_0910500 SSKIKLNQHTNCFVYFFKVIHTFDFLANNLSDLRGVQIICS DTINENKTHV-NKKSILYFyVNteknknknckya  
LF\_Rev1 YDKVQLNHYTDSMEVFFFKTISTFRI IEDKLHEL RGVELSISDIISGEINYS-NKKNILYF-----  
PHC\_Rev1 KSQIKLNNHTNFFVYFFKVI FKFQYIMHKLEDLRGVQLTCFDI IKE-VSRP-NNKSILHYF-QN-----  
PHT\_Rev1 KSQIKLNNHTNFFVYFFKVI FKFQYIMHKLEDLRGVQLTCFDI IKE-VSHP-NNKTILHYF-ANtvkrkntstii tmsk  
HPC\_Rev1 GSKIKLNSYTNCFFIYFFKI IYEF SALSSKLEDLRGVQIVCSDMIHDETYYPvGKKSILHYF-----

Pf3D7\_0910500 swkddnflevpqkvndkdqvgenvkdphqinenkiHLHNIMLSSQKKNETNKKETNGKISKNNinsssilsyikdknkg t  
LF\_Rev1 -----HSMNKRSIISKSKEGKEVSDPKEKMNRvet-----  
PHC\_Rev1 -----  
PHT\_Rev1 nskndtllslylndstqqkmennyiketntneelvHWEGKEKEKEKGKEEGKKEGKENEKER-----kkkll  
HPC\_Rev1 -----

Pf3D7\_0910500 niltsqinwthSNNNNNNNNNTYSRKEIRKTVRKGTSTSIKRKIKNKINthiryDK-----NIRNNKLYH--yeYKQ  
LF\_Rev1 -----HEEETTSNNKQEEEEERQITS TNKGSKDKTFKNRMTEK-----KQSNT--knVKKRKNEVi---KCK  
PHC\_Rev1 -----  
PHT\_Rev1 nkkpknsnrkHNSSCNSNEGESKIKRKRKTGI IKNEETYEKKITDYIEgfvtlKSSSTynstNVRKKKNTNdicdNTK

HPC\_Rev1 -----RASADKSINKSINKSINTSINKSINKSIN-----KSINT-----NTS

Pf3D7\_0910500 NILNYFVHNNHNSNRTQNLIHKKENNFQNNQNVSLCSskTINKGFKRKCNIILRSNANfLNIRKKIKITKNYKISDFFPS  
LF\_Rev1 NILSYFVKN-PDIKNNNSILQISNKLIRKNNHNSVLQG---YIRISSKQNMPLKKKSS-----SRIHVYRNYRIYDFFPL  
PHC\_Rev1 -----  
PHT\_Rev1 DILSYFIKNINEVQTKNQLINRRTTKI IKGTKKTQNRNncfHPLLSTQNIKFIRSRSMhIEKYNQRKETVELEHINMFDS  
HPC\_Rev1 NIKKVYKKREKKQSTNSNKL SVNKKMYVNN-----LKKIAKINVTQNYKILHFFPN

Pf3D7\_0910500 ILKKKIY---IRNNKNIYDDEIKTYGNGNI IMHTNIFDSI INKKIKKENdeendeene-eneqnekneknelcdknyHMK  
LF\_Rev1 FCKNKINretTNNESRSMDDDEDNDSSCTSDHKKNIFDSISNVKIKKEQ-----RIK  
PHC\_Rev1 -----  
PHT\_Rev1 IINMKVN---VKTELDAYIEAEVSKEKEKGGKGGTEKEIEVKVQVKTEAgsgteaeteteieaaetei keeaeteiEKN  
HPC\_Rev1 ILIKRQT-----NDPKNGTKNGTKNGTKNNKVKTNMYDSIFNLKIKNEK-----EML

Pf3D7\_0910500 KQFTCCYFRYKEITQYL-----VHKEKLFEEENHK-----CNDLCRNDIFCFTYICNNLFLFNHTND-KLN  
LF\_Rev1 EEPTCCYLSYQRHHHI-----QVLITLE---K-----WEDDDTKNLFYCNSLNCNELLLMNQHNVNQMH  
PHC\_Rev1 --MTCCYKFCIKIYSDV-----KEKQNAHTHNVN-----YFVECAHHSICYICICNRLYVISQKNEEKFH  
PHT\_Rev1 QKMTCCYKFCITIYSDV-----KEKQNAHTQNVN-----YFMECAHHSICYICICNRLYTINQKNEEHFH  
HPC\_Rev1 EEVNNCYLCYQQICNSAtgtgtgcccndigivsKIDSNATTEKISdstsvCKQNNNSGLFCYACICKDLHQFNKKND-ILS

Pf3D7\_0910500 LYLYIKKIINSYRSYFHNTFEEHDCVCNNTlkkdqeNIYYLNKFMVKVIDDICEMLHKKRYIDVLQNF LKNFKYVWSLNN  
LF\_Rev1 LYLHIKRMILSYISYFNHLYEKHDCENTNK-----DTKFVYKFVLDHINNISNTLHNYKQIDMLFTFLIHFKRVWEIYK  
PHC\_Rev1 FYLYVKKIFNSYISHFINILKNHKCDTND-----DNEYLYKFLLYILNDLCEILHKKRFIDVLQKLLINFKCFWKLQK  
PHT\_Rev1 FYLYVKKIFNCYISHFMNILESHKCDTNDissddvnKDKYLYKFLLYILNDLCEILHKKRFIDVLQKLLINFKCFWKLQK  
HPC\_Rev1 LYIYIKKIYAYINYFNIFCDNKCNNNCD-----SQYYLQKFICYILDNICNELHDKRLIDILHIFLTNFKHVWCLDK

Pf3D7\_0910500 -ELFPEIFQRIILIKYninhmtt  
LF\_Rev1 -FPYSQILQKILIK-----  
PHC\_Rev1 kDLFSNLLQNILNKY-----  
PHT\_Rev1 kDLFSNLLQNILNKY-----  
HPC\_Rev1 -KPFPSIFQTIIFIKYnv-----

## DNA Polymerase ζ Alignment

Pf3D7\_1037000 MNLAEKPKAFFICKFLFFYYIYKKPILPFDSLKCKISGKEIPYVCI IQILGLSLLGQRVCLYIHDFYPPFFYLLIPPEEKQ  
LF\_PolZ -----YGQQVCLYVHQFFPPFFYVLIPEEKE  
PHC\_PolZ MNSLEKANVFFICKFLFFDYLMTKPKYPLDPSKCTISNRELPFVSVIRILGVTPYGQTVCLYVHDFPPFFYVLIPEEEN  
PHT\_PolZ -----EKY-----  
HPC\_PolZ MNIIDNPEAFFVCKFLFFYYIYKKPTLPFDSWVCKISNKKIPYVCVIQILGLTLYGQSVCMYIHGFYPPFFYVLIPEEKG

Pf3D7\_1037000 NDKLEIELCSFLEEEY GKARKDPSNNV-CVYNI ERVKRKG IYGYNEECDD FLKISFLYPNTINYFASLLKKKLFKKRIWD  
LF\_PolZ NYDLEKELCFFLDNEYHKL GTDKNKNV-CVYNI KRVKRKC IYGYTEDYED FLKISLLNPDVVKYVASLLKKKLFKERSWD  
PHC\_PolZ NPHLERELCDFLETQSKNNKKQEGRVS-CIYKI ERVKKKC IYGYTEKLDT FLKVYVLPDVIKYLATLLKRKLFKSKSWN  
PHT\_PolZ -----EKHEEVVS-CVYKI ERVKKRC IYGYTEKWDT FLKVYVLPNPNWIKYFATLLKRKLFKNKSWN  
HPC\_PolZ NKNLEIEICKFLEDEY GKLKKN TNENS vCIYNI ERVKRRC IYGYKECHDD FLKIYCLYPDTIYYLASYL SKPLFKNRI--

Pf3D7\_1037000 LYE VHI NYMLHFLC MKNIYGCSEIYIDKNIYFRKEFVNEINFECIEKEERWYLgEKKYNLD -NFKRNKYLEVDAPLV  
LF\_PolZ LYE VHT NYMLQFLC SKEICGCSDFIGRGIQFRPDLPKDITFHQFSKVEKWDL-TLKNDFE KKI KGSKYIEKDAPKY  
PHC\_PolZ LYE VHIT YMLHFLC SKNIYGGAEIYIDHNIYFRKEFPEDTLFDNFIKHEKWKV-QKRWEFD EHIQRSKYVDKEAPLF  
PHT\_PolZ LYE VHIT YMLHFLC SKNIYGGAEIYIDHNIYFRKEFPEDSLFDNFIKHEKWKV-QKRWEFD EHIQRSKYVDKRAPLF  
HPC\_PolZ LYE VHIN YV L HFLC SKHIYGC SKIYVNKNIYFRKDFVSSINFENFIKEDKWDV-KKKKTNT [ 5 ] ESVKKNYISADAPYV

Pf3D7\_1037000 FTIKTINVNFSSLKRETTYDIECDIKHQHILNEKIYTYE FEKNKIKWKKEFNFDLPINHLDSFAKMWMKEKKRCKYMDMD  
LF\_PolZ WTYETRDVVSFTLQKETKYDIECDILHNEIMNEAICIHKFEKNKKKWKKEELGQEMPLQYIETFVDIWIKEKKRCKQKYPH  
PHC\_PolZ FTKKTKNVNFSSKWERETTYDIECDIKHQSI LNEQVYSYEF EKNKKEWKREMGFDLPVGYLDAFANLWIKEKDRCKNLNCK  
PHT\_PolZ FTKKTKNINFSKWERETTYDIECDIKHQSI LNEQVYSYEF EKNKKEWKREMGFDLPVNYLDAFANLWIKEKERCKEVNYK  
HPC\_PolZ FTQETRNVI FSNLKKETS YDIECDILHDN I LNQQIYTIKFNKYKKKWKKEELNFDLPINYIDSFAKMWMKEKKRCKNVNPE

Pf3D7\_1037000 LKRELFYFKSYENDLCFDTFDVLTERTKKMFQGFLEFMKRM----QSEKDKVNYEQILEYDNIENVKKYNKVINDDMKLLK  
LF\_PolZ LAKELFHFD-----  
PHC\_PolZ QLKEIFHF DKYETEVDNFNTFDILTARTRMLDDFAKFLENR-rnEKREKGN SMEPQHEAKHEAKHEAKQGAENETKSEK  
PHT\_PolZ QLKEIFYFDKYETEVDNFNTFDVLTERTRMLDDFVNFLKERqrnENRQK----ESLKETKQKEKQEEENVTENKTETET  
HPC\_PolZ LMKTI FNFDFEKKLDFNSFDILTGRTKWLYNQLVTFIKSR---EQKNEPNIGNEKKNLSSNGKVDEKDIKTGDMLKKG

Pf3D7\_1037000 EDHNFNSDMNIEVNIKQINNNDNINNCKNV-VDNEEENDMLS NMI SNKKKDHMGISP NLF---IQNKEQEKEKQDEREK  
LF\_PolZ -----  
PHC\_PolZ ENKTNNETE H KPGNETKTET-----KS IKKDETSPLSHANVI INDI ILLAGPMES---KQINNKEFQKDYQMEKEK  
PHT\_PolZ VNKTNNKTENKTENEIETETENKTNEIKQIETDNKSSLSDTDVIID-----YNPTDSIKKQIKNKKYHNDYKVEKEK  
HPC\_PolZ E IYDKKCSHSEINNNIKKSQNI EKEHN VGLNNTNNKLANTNNE LANTNKEI VVMTDYKKIR-NKVNNKVKGMASFEINK

Pf3D7\_1037000 EKQDEREKEKQDEREKEKQDEREKEKQEEEREKEKQEEEREKEKQEEEREKEKQEEERECFIEYVNEKGCIASFEINKKRKDVV  
LF\_PolZ -----  
PHC\_PolZ IEKDYLKKAHTDVVENHVNSINEKKNSVEAPCHINTKGKITGTDVKTLTNINRKANEANNCYTTKVLQSEKEGEANL  
PHT\_PolZ NEKYSLSKKEHKNVVAIYSNDSENDRKENSVEVTTCHINTNGKITGTNVSTLTNINRRINEENNYCRSRLQSEKEGKSYL  
HPC\_PolZ KKKYVI-RYVYKKKMPIIKKGYAVSRFWRGAHNIVGSNDDAGINEDNVNGNVN-NSWNNVNSGNDNV---NNSGNDV

Pf3D7\_1037000 RYS [6]RINKCYAVINNLVDHISGRDNKN- MKEKMKG---NIYNRIHDNIED ENKEDTSKFEYIgkeNHMENK  
LF\_PolZ --- -----YSK-----  
PHC\_PolZ KNS KNIRYTTVISKSITNEKRNNNRFI [4]LHNKLGivrYIYKKKPPRILN [9]RDKTKEKEAEAEadiDKQEKE  
PHT\_PolZ KNN KQIHNSIVINKSITDEKKNNRFI [4]LHNKLGivrYIYKKKPPRVLN [10]KNKTKEQKPERD---DKQEKK  
HPC\_PolZ NNS [1]-NDNINNSGNDNINNSGNDNRMV -HNQTKC----- -NKLEENKVR-----NKKENK

Pf3D7\_1037000 ENIRKQYEQIKSDNMKKKINIKYGNIFFLEILTEIKDENCYSSDYNQDKIKAVFYIVREERLMNLYEDYNNCMGIIATKP  
LF\_PolZ -----  
PHC\_PolZ KCTTQKVEKTMEKILPRKINIKYGNLFFIDILTEIEGEEWYYPDALQDEIKAVFYVIEDERIKSYENYDVIIGIASKP  
PHT\_PolZ KYSTEEVEKTMKKIVPRKINIKYGNLLFIEILTEIEGEEWYYPDALQDEIKALFYIIEDERIKSYDNYDVIIGIASKP  
HPC\_PolZ K-----SIKYGNIFFCEILTAIKNENCYSSNYEDETKAIFYLIKDERILNSYEEYTNVCGIATKP

Pf3D7\_1037000 FP [75]KNVINKKNDTYGSS [20]NNDIKKVK-RTFFDFNINYNVNICIVENERELIQKLINKILFYSPLSIVSYEND  
LF\_PolZ -- -----VNVCIVEDEIELIQKLVEKINFFCPLSISFENH  
PHC\_PolZ FN RNIMNGLKWSQLGTK GKDVKEKsACSSSFLPDVDTVNICIVENEKELIMKFIELIRLFCPLSISYEND  
PHT\_PolZ FN RNVLNVLKRSQLGTK GKDVKGKsRNSSSFLPDVDRVNICIVENEKELIMKFIELVRLFCPVSISYEND  
HPC\_PolZ FP [6]-----KELYKELINKINFYCPLSISYEND

Pf3D7\_1037000 KYNINYNQRCLALDIGNFYKMIC---KLNDQKFLDLHNAYSRNIGKIIIESLYKLSNTYNTSFENLCKHYLNINIPSI  
PF\_PolZ KYGINYNERCILLDLGNFYKLIS---KVKDQCNFLQYNNNSYNKSIKGRVI---CRLADVSNSSFENICLEYLRVTIPSI  
PHC\_PolZ KFSLNYINKRCTILKIGNLYKLMS---SVNNQPVFTDMNNSYNKRIKGRVIESVYRLSDESNTSFENLCKVYLNVTIPSI  
PHT\_PolZ KFNLNYINKRCATLKIIGNLYKLMS---NVNNQTAFTDINNSYNKRIKGRVIESVYRMSDESNTSFENLCKVYLNVTIPSI  
HPC\_PolZ KYNISYNKRCFLNIGSFYMHIS tnnKLNDQYNFINLKNTHKTNIGKIIIESLYKLTNISNTSFENLCKHYLHINIPTI

Pf3D7\_1037000 NKYTLYYWYNYNTRKRIKANGSSTVVNKD [7]NDMDEEHIYFPYRHITIKHYLRKVYFILLIYDKICFLKRMNFCKYIH  
LF\_PolZ SKYTLYYWYSYENKKKEDG-----LISRD SCSKESSTFFPYRYLTMKHILMRLNLIQLVYEKINFLKRMMSFAKYLH  
PHC\_PolZ SKHMLLYWYIYSSG-YKDNRHGTCIDS DN SCKDNNCIYFPYRYIVIKHMLMRVIFTKQIYEKINFKKKIGFAKYTH  
PHT\_PolZ SKHLLYWYIYKDKMYKDRCPVDFIDNDN NCGNNSCMYFPYRDIVIKHMLMRIIFTKQIYEKINFKKKIGFAKYTH  
HPC\_PolZ SKYTLYSWYMYNEQ-----DN -----

Pf3D7\_1037000 VDLLSLINRGSQYIESFLLKMSIKYNYVLYSPSNKEIFDQRPILHTPLIILQPKSSINFFPLLVFDFQSLYPSILIAFNI

LF\_PolZ VDFLSLINRGSQYIIIESFLLKLAMRNDYLLFSPSNKEIFHQRPIMYTPILIQPLSSINFFPLLVFDFQSLYASIAIAFNI  
PHC\_PolZ VDILSLITRGSQFIIESFLLKISLKRNFLLYSPSIQEISNQRPI LHTPVLVLPQSSSQFFPLLVFDFQSLYASILIAFNI  
PHT\_PolZ VDILSLITRGSQFIIESFLLKISLKRNFLLYSPSIQEISNQRPI LHTPVLVLPQSSSQFFPLLVFDFQSLYASILIAFNI  
HPC\_PolZ -----

Pf3D7\_1037000 CYSTCLGTITLKR[13]KDENIEGSLMEKCETYKNGINDKNhiyDKNELSCSNKNDLPSDEYTDMMNISEDAKYLIDLLD  
LF\_PolZ CYTTCIGTLTKKR KTQVEKIHQEEEEKEEHTNINISN---DSKNMNPINMNNTTNTALQLNFEEKKNIEYEFNDLN  
PHC\_PolZ CYTTCIGTLCRKS[13]SSKNERIPLRESVEKTDKPLQTNQ---DKFQTNKSKTKWRVFDLEIYQIYENKQSSVRYVSSS  
PHT\_PolZ CYTTCIGTLCRK- --KNERIPLRESVEQTDKTIQTDH---DKFQTNKSKTKWRVFDLETFQMYENKQSSIHYVSTS  
HPC\_PolZ -----

Pf3D7\_1037000 ENIND[21]GENIPSENMITED[4]KYKLDMMNKLEMGN[14]NIN[7]EEKSLESNFEFIKLGVMKNVPSISSRIKNLK  
LF\_PolZ EKHNE DEEEEEEEEEQEN[4]IHANHLNDDSQSKN NGE ETSEEEIYDFLKLGVKKKDPRI MRVVKQLN  
PHC\_PolZ EKKKE GEDIRREEYSGNE IFENEKNDKKKI-- ---SDEEIPFEFIKLGVKGKDETVMEKVKDFR  
PHT\_PolZ EKKKE GENTRREDYRNGG IFENEKNDKEMVL NEE[7]TKSDKNIPFEFIKLGVKEKDETVMEKVKYFQ  
HPC\_PolZ -----FEFIRLGVKKSAPDMRNTLKNIK

Pf3D7\_1037000 SEDIITSNNTIYVKKHKRKGICPLFLEDILKTRIMLKRCMGMYEER-VNKKLNERMGKLLKILNVATGYIGANFSGRMP  
LF\_PolZ RNDLIITSNNTIYVTREKRKGLFSIFLEDILKSRIMLKRCIEKYNEPRIKKKLEKRVHLFKLVLNVAIGYIGASFSGRMP  
PHC\_PolZ KDDMVITSNNTIYVSRKIRKKGICAVFLEDILKTRIMLKRCMNIHSDKYIKKKLSDRTFIFKLIILNVAVGYIGASFSGRMP  
PHT\_PolZ KEDIITSNNTIYVSRKIRKKGICSVFLEDILKTRIMLKRCVNIHSDKYIKKKLSDRTFIFKLIILNVAVGYIGANFSGRMP  
HPC\_PolZ SDDFIISNNTIYVKKKHKRKGICVCFLEDILKTRIMLKNKIVICNGR--ETQLKEKIQLKMLLNTAAGYIGASFSGRMP

Pf3D7\_1037000 CVDISESIIISIGNRFLFLIEYIKENYKFKVILYGD TDSLFLLNETtDDIQSSFKLAYEILNSINNILPLPMYLNFEKIY  
LF\_PolZ CLDISESVISLAKNSLMFIIQYIKNNYANTQILYGD TDSLFLLSKC-DDMLYSFCLAHHTTHINNI VPTPMCLIFEKIY  
PHC\_PolZ CVDISESVISIGNSLAFIIEYIKRKYINVDVLYGD TDSLFLLNKT-DNLHYSFQLAYNIINTINSILPPPMFLNFEKIY  
PHT\_PolZ CVDISESVISIGNSLAFIIEYIKRKYTNVDVLYGD TDSLFLLNKT-DNLHYSFQLAYNIINTINSILPPPMFLNFEKIY  
HPC\_PolZ CVDISESICTGKNFLFLIEYIRINYKYIKILYGD TDSLFLLNKI-DDLKYSFNIAYDILNKINNILPKPMFLNFEKIY

Pf3D7\_1037000 CPSLLLLTKKRYFGFSFKNENQDNPI DLKGVESIRSDQCILVKNILIQIYFIFLYFKNNCYFSYCCCCYLCKNFFSNLI  
LF\_PolZ SPSFLLTKKRYFGFAYKNEKIKKPILEIKGVESIRSDQCELVKKILKQVYFIFYYFKNHSYISRCCCCYLCSRFFNFI  
PHC\_PolZ TPSLLLLTKKRYFGFCYKNEFQKKPVLEIKGIESMRSDQCDLVKKILIQIYFVFFYFKNSYISSCCCCSLCSNFFSNLF  
PHT\_PolZ TPSLLLLTKKRYFGFCYKNEFQKKPVLEIKGIESMRSDQCDLVKKILIQIYFVFFYFKNSYISSCCCCFLCSNFFSNLF  
HPC\_PolZ CPSVLLTKKRYFGFAYKTENVKKGQIEIKGLESIRSDQCELVKNILKQIYFIFYYFKNTCYFSYCCSCCYMCVNFNTFV

Pf3D7\_1037000 CSC--KELNVHKTDCFLFTLLKIVLSicKVRRYINQNE DKYInNNNNNN[31]DKVKLYKEVMNWVEYDNE NLLLK  
LF\_PolZ CNC--EKTGIHQKDHCFELSELLSTI-----LEIPLNDKLDKTElpKEGNTEK ERRYYYDELLHLLNF-DTHNRLQ

PHC\_PolZ CSCtcKESKTPPNRPCFLSKLVKVVYP--ELQEFENNSLQKTT--KENWTKE TTKQFFDKCLQLLTKKEGNNIILK  
PHT\_PolZ CSCtcKKSKTFPNRPCLLSKLLKVLFP--ELBEFTNNKLQKMT--KTNETNE TTKQFFEKCLQLLTKKEGNNDILK  
HPC\_PolZ LYC--NVSYIHRKEPCDKLKLYKDI IK-----LIKMD-----K -----NNTVLK

Pf3D7\_1037000 TLNFLYREKYSFLIYLFNLFDEATLHKEIEKIIQTNFEKIQNQKNN-KCCFINPSNVFKSCLCVKNI--NENIKCDQIRCY  
LF\_PolZ MLHYLYNEKYSYLMYTYTYHGPGILKEKVKKIIKDFDKLCSFAHN-NCLVDPNNHFNICLCVKEE--NRNLKCSKNTCY  
PHC\_PolZ TLNFLYKEKYNHLFYIFTHFDSVTFKREVGNLIKHKDEIVLDRYDyDCCFNSEGNVFNLCFCINEK-DRKYKCDNTKCY  
PHT\_PolZ ILNFLYKEKYNHLFYIFSHFDNITFKREVQNLIIKHKDEVIMDRQDyDCCFNLEGNVFNLCFCINEN-DKKYKCDNTRCY  
HPC\_PolZ TLNLYLYRNKHYYLLYILSNCNELVLKKKIQFIETDYEKIKEEQNE--CCLTNPNNILKICLCVKHTgDGNERCDSNNCY

Pf3D7\_1037000 CNVKQAMFFFYNP-TYNkvdYVFNTKLFYSHLLSHIRQTLSEYFNKIYDNQISCDNFIIYRKVKLGTYKGEMQGIRRKVS  
LF\_PolZ CNIKQSMVfy-HA-EMN---YVFHTRPFYEHLSQVQVLLSIFIDVYENKIPLDNFIIYKQVKLGTYKGE LPNQKRKVP  
PHC\_PolZ CNFRQNYFFYVEN-NES---YVFESKLFYKQLSMKIENVLHFI FNKIYKNEISIDNFLIFKKVKLGTYVGELENLKRKVP  
PHT\_PolZ CNFRQNYFFYVEN-NKG---YVFESKLFYKHLSMKIENVLHFI FNKIYKNEISLDNFLIFKKVKLGTYVGELENLKRKVP  
HPC\_PolZ CNVKQATFLHYSGgNNNttYFIFNKKFFYSYLSLTIENVLSTYFNKIYNNTI PYNEFIYKVKRLGTYKSELKNNKRKTP

Pf3D7\_1037000 LPPQAI VARKIMRDFPNSIITYKEKVPYIFTKKLKDDKIYSSVSHPHFIRGIYRSFRFDGCGSTEQLE--ISEDNCNNDSE  
LF\_PolZ LPHQAI AAKRMYQLFENCLILYKDKIPYVVSTKLKKEKIYESVSHPFYIKGLYKSCCKYFENYSALEksTEEDEDEDESE  
PHC\_PolZ LPPQAI VAKKLQHFKNMTMISYKERIPFVVVKKLKEEKMYTAVCSPFFLKGMFKSC-----  
PHT\_PolZ LPPQAI VAKKMQHFKNMTMISYKERIPFVVVKKLKEEKMYTAVCSPFFLKGMFKSCSNVFKNYHQIFqhLLEIKNNNQIQ  
HPC\_PolZ LPLQAI VAKKLLKTYSNVIISHKEKIPFIITQKLKGDLYDSVSHPFYIKGIHKTKKEELKN-----

Pf3D7\_1037000 KNGDiEKNDNIEKND -NIEKIGDIEKIGDIKKIGDIEKNENIEKNENIEKNDN [125] KFNWNK-AKLEMFSKYYKN  
LF\_PolZ KEKEfnKKNRKKNK [6] LNYEYYIENLVLPLKRMLDLLPFSTLNLEKIAHMARR KYNS----NYYQMSFFRNL  
PHC\_PolZ -----  
PHT\_PolZ IQNQ-NQEKKEKKNE [6] INYEYYISNATIPPLKRMLDLLPFYPLDLEKIFYNTRR GGNDLktQSIEETSNIINK  
HPC\_PolZ ----- INFNYYIENLI IQPVKRMLDLLPMCSINLEKIFFKTKK QYNLNK-GKIDIFSAYYGS

Pf3D7\_1037000 MDNKLK--NNNVTNKGINLMNILNEDKINNK [49] KIMNSYVEINKSQNMLKLNKICLMCANSEMEALACNYSVHCKI  
LF\_PolZ QNEHSLNkeSNKEIRQEKYVTELLEEEENQQT CIIKSYIKINELQNKMKVNRKCLECTNSEVKALACQYSIHCP  
PHC\_PolZ -----  
PHT\_PolZ RKKIYINmeGNNEYEKRKEK----EKEKERDK EIINSYILLSKYQNEMKLNHICFSCAHSEIKALGCSYAIHCPV  
HPC\_PolZ NTKKLLN--NNAKYNKKIKIKITNNSKIENK KIINNYIELNKSQNMLKRLNKLACANTEMEAMACNYALHCKI

Pf3D7\_1037000 FFKRINLQENILKNKDSINrls  
LF\_PolZ YLKKLQLEEQILIQQEIVE---  
PHC\_PolZ -----



PHT\_Po1Z  
HPC\_Po1Z

YLKKNLEEKISKCKEITSr--  
YFEKNLLVENISKQKV-----

## SNF2 Helicase Alignment

Pf3D7\_0604600 [438] FLYNKKFINFIE-SIKNRKG-IyKKVLNKYLSAYLKNDDFFNEINYLPLTWKPRKDYIKAGIFPFNLSKNNRKIES  
LF\_SNF2 -----FFNEMNYLPLTWKPRKDYINSGVFPFYLLKTKKIES  
PHC\_SNF2 FLYNWKFFQQFIEyQIKVRKDeKiKKRTRILSKCMDNDDFFKKINYLPI TWKPRKDNIESAIFPFYLSKKVKKKKT  
PHT\_SNF2 -----  
HPC\_SNF2 [332] FLYNEKIVHMLE-MEWSKKY-L-KCLMNKYLSTYLKNDDFFQEMNYFPLTWKPRKDYIKSGIFPFYFAKNVKKINS

Pf3D7\_0604600 FGRLSVNNNNYLCGCVFPLCTYQLIVRYFYIKLFHTCFIYQIPNFIFYFFRYYYRinNNINKHKMYNYFLKNKYINIFIN  
LF\_SNF2 FRKLSYNNNNYLSGSVFLSSYPLIIRYFVSKFSHSFFIYQIPQTVLHFFSYFYP--TYNNKYRLHRYFLRDQYSSLLEK  
PHC\_SNF2 FRKWSIYNNEYLSGCVFNLCSYRLIFRYFISKFMDIYFIYEIPQTIIFYFRHFYK--KKYRKLNCYQYFLKDQYTNVLKD  
PHT\_SNF2 -----  
HPC\_SNF2 FKRLYVNNNNYLAGCVFNLCTYHLILHYFIYKNFETCFLY-----NLN-----

Pf3D7\_0604600 IYhSKYQILDTIKEE [15] QKE [7] IKNLVLFQDLSNNTYIFSKQKIEKKI INHYHKKIQKIKRQMNQEIKNICLNEI  
LF\_SNF2 EL-TNWEREEIQIQER [16] EKE ILDQYHYEELCMNTYIFEKTELKKEI INHYFMKKECKIRKRSHKKIKEMCLDQI  
PHC\_SNF2 IM-AYKSPIITLKEK ELE VLKSYDFDELCSNSTFFLDKEQIRMEI IENYMKQKNKIQKKIQKELKMKCLKQI  
PHT\_SNF2 -----  
HPC\_SNF2 -----ELCNNNYIVSRKKLTKEIYKNYFEKEKHKLTCKFHKQMKELCLNEI

Pf3D7\_0604600 KKKLPIRIQKVIILTYQLQAIYFFFKKRGRILIADEMGLGKTLQAISIFYFYHLYPVLIITPASLKINWFSEIEKYLPAFD  
LF\_SNF2 KRKLPRRIRNVILPYQLETIYFFKKKGGRILVGDDEMGLGKTLQASISIFSFFKLYPVLIIVCPASLKTNWLCEIKKFVPFLD  
PHC\_SNF2 KKQLPLAIQKIIILPYQLETIYFFKKRGRILLGDDEMGLGKTLQAISVFSFFQLFPVLIICPASLKINWLEIEKFVESLD  
PHT\_SNF2 -----  
HPC\_SNF2 KNKLPCKIKNVILPYQIETIYFFLKKGRILIGDEMGLGKTLQASISIFSFYHLYPTLIVVPTSLKIHWLSEIEKYLPQFC

Pf3D7\_0604600 PQNVLIINSSNDMPKCASSYKIIIVSFNIYKKLYNLLKEIQFHLLIVDESHFIRTVHYGNQSQLTRLLKKKIRKTKHVLV  
LF\_SNF2 PSKILRISSNDVPNDLKKYKIIILSFHMFRRHTFHFIRFIQFQLLVDESHHIRSVHSGKESQLTNMMGLLTKQIKRVVF  
PHC\_SNF2 LSFILLVNSSNDLPKLHAHYKVIITSYEMFKRLYDVLKERTFRLIVDESHYIRTVYCGKESKFTETIKELAKRIKNVLF  
PHT\_SNF2 -----MFKRLYDILKERTFRLIVDESHHIRTVYCGKESKFTETIKELTKKIKNVLF  
HPC\_SNF2 ITQILVIHSSNDPCPRLDARYKIIIVSFDIYKRLYNVLKQIEFKLVIVDETHHIRTVYQYKQSQLSKKLKNKIINSKYVIL

Pf3D7\_0604600 LSGTPSINRPINIFHQIKYLINNNKNIIFPKNKIIFGEDYCKKYFYRGEKIYEENLRSWEFHYFLNKIVMIRRTINQVFQN-  
LF\_SNF2 LSGTPSVNRPINLFHQIYLLIQNDSIFCNTKFI FGEEFCKRSMRGERKYEENLRAWESLFLKKTVLIRRHISVLDL  
PHC\_SNF2 LSGTPSVNRPINIFHQLKILINNNKNIIFPKNKYIFGEEFCKKICRRGEKIYEQNLRSEFFMFLKKTVLIRRLQQIFKE-  
PHT\_SNF2 LSGTPSVNRPINIFHQLKFLNNKNIIFPKNKYIFGEEFCKKICRRGEKIYEQNLRSEFFMFLKKTVLIRRLQQMFKK-  
HPC\_SNF2 LSGTASVNRPINIFHQIKYLINNNKLFKKNKYVFGEECCKKYIHRGEKIYEENLRSWEFSLFLKIVMIRRNKIIFKN-

Pf3D7\_0604600 NFP<sup>SLKR</sup>RFVYLKNDICDN [11]HEN SFINNSE [10]KCGYK<sup>MD</sup>EMYKMNNLDKNNN [11]DDQNEYKH [12]SKKP  
 LF\_SNF2 QFLQLK<sup>RR</sup>FFVFLPQEVKNE --- -----  
 PHC\_SNF2 NFPNLR<sup>RR</sup>FFVPLSDP<sup>S</sup>MDT --- -----  
 PHT\_SNF2 NFPNLR<sup>RR</sup>FFIPLSDP<sup>F</sup>MDK [11]TDE [6]ETLHTNL [10]NNNHLNNH<sup>L</sup>LN<sup>N</sup>HLENNHL [10]TEIGTEIG [ 5]CKCI  
 HPC\_SNF2 NFINLKRYFI<sup>F</sup>FLPKD<sup>---</sup> HDK SSIHSSR KILDKNESIEKNDNTDKHNT DKYNTDKY [ 1]TDKY

Pf3D7\_0604600 EQSKLNNSIIYKQERKHK<sup>N</sup>REILN<sup>Q</sup>YFHIDIK SKKEE EGVSKIV -NALQFIEKNFPNKKKIIFCY-HIM  
 LF\_SNF2 -----MKEKENEVETNRREKLNKIYQVKL- [1]SKKEE EGILKI- KEGIEWIESHFPNEKKILLCY-HLV  
 PHC\_SNF2 ----- [ 4]KKEMKQIKIENKNVKKIILCNeHDL  
 PHT\_SNF2 EEELLLKLIKKEQE<sup>Q</sup>EQE<sup>Q</sup>EQKQ<sup>Q</sup>VHSPCIN [4]DKKKE [49]EKVQKIK [90]KKEIKQIKIENKNVKKIILCNeHDL  
 HPC\_SNF2 NTDKHDNTDKHDNTDNTTNRQKLNDF<sup>F</sup>HVNIK SKKEE EGLSKIV -NALEYMETYFPTKKKIIFCY-HLI

Pf3D7\_0604600 VSK--CTEDEL<sup>L</sup>LKI<sup>I</sup>KQKK EKENISIDYVSLNGCIPEKEK-IEKILYFQNNINCYYGIFTICSVSHGLD<sup>F</sup>SFCNL<sup>C</sup>F  
 LF\_SNF2 ICK--CIEDEL<sup>L</sup>LKRIAKKK EEDTSLLDYVINGKVSEKHK-VERINYFKTNQTCTYAICTIGSVSHGFDF<sup>T</sup>FSNL<sup>C</sup>F  
 PHC\_SNF2 FCDgdCRKVYFLK<sup>K</sup>SSNSL [5]ERDQGICN--VCNLD<sup>C</sup>SDLLKqIRRMKYFSMEEKINYFI-----KYNPL--  
 PHT\_SNF2 FCDgdCRKFYFLK<sup>K</sup>SSNSL [5]ERDQGICN--ICNLD<sup>C</sup>SDLLKqIKRMKYFSMEEKINYFI-----KYNPL--  
 HPC\_SNF2 VCK--CIEE-----SIDYVVLNGSLNEKEK-LEKINYFKNTSNCYYGILTICSVTHGLD<sup>F</sup>SFCNL<sup>C</sup>F

Pf3D7\_0604600 FMEFPVNFFHLQQCESRLFRKNQKHNTYVFYF--LLQKGLGSDHKTWNRFILCSNSTRSII<sup>D</sup>GTNFINKDLIYDNI [467]  
 LF\_SNF2 FFELPVNFFHLQQCESRI<sup>F</sup>RRNQT<sup>K</sup>DTYVFYF--LLRKGLGSDYNTWNRFLKCANATHSVVDGVNFDHSDL-----  
 PHC\_SNF2 FLE-----NINQLKKII---DSPKEGYIWQVdhIIPVYKGGGQASFENLQTLCTFCHQKKTCDLQNKKEIKTRK [ 3]  
 PHT\_SNF2 FLE-----NINQLKKII---NSPKEGHIWQ-----  
 HPC\_SNF2 FIEFPIDFFHLQQCEARLFRRNQLYDTFVFYF--LLKNGLGSD<sup>E</sup>KTWKRFVLC<sup>A</sup>HSTRSTVDGT<sup>C</sup>YEGN<sup>D</sup>LFYEKF [410]

## RING Finger Ligase Alignment

```

Pf3D7_0415800      [8]VQNNLNRRARHSLTNTLSDMRLDE-SYLKSIRMNIKKRFDKLMNKIIPFET---IDENKRFVVIIEKKKN-YENFRCP
LF_Ligase          -----ESLKQSLLSQYEEQSEDP-DFIYNFRKHVKRTFELWIDRVVPLNR-----LVDRRFIVLVENRKN-YDNVRCP
PHC_Ligase         IIEKTNEARNILVKQVNELKAED-ITLSVCRSYIQEKMKNFIDVCIPA----KIIKERRYIVIKDKHKKH-YETFQCA
PHT_Ligase         -----LVNQVNELKEED-ITLEVCRSYIQEKMKSFIDVCIPA----KVIKEKRYIVIKDKYKH-YEAFQCA
HPC_Ligase         [8]INNNMENIRNNVIKAFENLRQIDnIYVNVNRTEIQKKVNSLLYKCLPLSEdkKIINERRFIVIEKDKNkYDNFRCP

```

```

Pf3D7_0415800      ICMLILFKPVKTCGHIFCRECIEKVLLKFDYCPLCRNFIK-DKKLENVENSTLGSEYENIKIRCYKCKEITNIKNYEKH
LF_Ligase          ICMLVFYKPVITNCGHTFCHECLKRSVDKYACCPMCREPIApDSSLSEINAEVLGSEYSSIKIRCSVCRDVMTIKDYDPH
PHC_Ligase         ICTFLFYKPVLTPCGHIFCGDCLKRSLKNFNKNCPMCRNDIT-EETIKDIPAEYLGEIYTQLVVRCPICRYKTTVGEYKGH
PHT_Ligase         ICTFLFYKPVLTPCGHIFCEDCLKRSLKTFRSCPMCRHEIR-EETVKKIPAEYLGEIYTQLVVRCPICRFKTTVGDYKRH
HPC_Ligase         ICMLILFQPVQTQCKHIYCKECIEATLKKYNHCPLCREVTS-NQTLTDLPISYFGREYTNIKIRCYKCKQITTIEKYEQH

```

```

Pf3D7_0415800      IINHI [26] IQKKKKNSN [4] ISNNNYIHNIYHHINPYNFDSYFNKKFQIIYMKEFFNLLKEhNINTHIDNFYLLYAQQNV
LF_Ligase          LVNKC      YSNRMKYRE [4] SIDNDITNKTKTNAHLKLKLNVFGKQFDINQMKELKRLLKK-STFDHIRHFSLVYAKSM
PHC_Ligase         L-----
PHT_Ligase         L-----
HPC_Ligase         LKNHI [ 1] YYGNKNYKN      NYSNYNSYLERTVKNLKNIKTLFNKKIRINEMNTFLLYIENiSIITDIYSIQLVYGRKV

```

```

Pf3D7_0415800      LYDFKH [607]
LF_Ligase          KEEHIV [389]
PHC_Ligase         -----
PHT_Ligase         -----
HPC_Ligase         FNEAIY

```

## Supplemental Figure 1: Amino acid sequence alignments for orthologues of the four components of the translesion polymerases described in the text.

Sequences for *P. falciparum* were obtained from the EuPathDB database while the additional orthologous sequences were obtained from the fragmented genome assembly of *Parahaemoproteus tartakovskyi* (Bensch *et al.*, 2016), the transcriptome datasets of *Parahaemoproteus coatneyi* and *L. fringillinarum* (Galen *et al.*, 2019) and sequence data of a *Hepaticystis* parasite that was mined from the transcriptome of a Ugandan red colobus monkey (Simons *et al.*, 2019) using the ContamFinder pipeline (Borner *et al.*,

2017). Alignments were generated using the Constraint-based Multiple Alignment Tool (COBALT; Papadopoulos and Agarwala, 2007) available through the National Library of Medicine, National Center for Biotechnology Information website.

Alignments are displayed in the “compact” format to reduce space. Unaligned regions are displayed as [X] where X denotes the number of residues for a sequence in the unaligned range.

## References

- Bensch, S., B. Canback, J. D. DeBarry, T. Johansson, O. Hellgren, J. C. Kissinger, V. Palinauskas, E. Videvall, and G. Valkiunas. 2016. The Genome of *Haemoproteus tartakovskyi* and Its Relationship to Human Malaria Parasites. *Genome Biol. Evol.* 8:1361-1373.
- Borner, J. and T. Burmester. 2017. Parasite infection of public databases: a data mining approach to identify apicomplexan contaminations in animal genome and transcriptome assemblies. *BMC Genomics* 18:100.
- Galen, S. C., J. Borner, J. L. Williamson, C. C. Witt, and S. L. Perkins. 2019. Metatranscriptomics yields new genomic resources and sensitive detection of infections for diverse blood parasites. *Mol. Ecol. Resour.* doi:10.1111/1755-0998.13091.
- Papadopoulos J.S. and R. Agarwala. 2007. COBALT: constraint-based alignment tool for multiple protein sequences. *Bioinformatics.* 23(9):1073-9.
- Simons, N. D., G. N. Eick, M. J. Ruiz-Lopez, D. Hyeroba, P. A. Omeja, G. Weny, H. Zheng, A. Shankar, S. D. W. Frost, J. H. Jones, C. A. Chapman, W. M. Switzer, T. L. Goldberg, K. N. Sterner, and N. Ting. 2019. Genome-Wide Patterns of Gene Expression in a Wild Primate Indicate Species-Specific Mechanisms Associated with Tolerance to Natural Simian Immunodeficiency Virus Infection. *Genome Biol. Evol.* 11:1630-1643.
